# Supplementary material for: Unraveling the structural properties and reactivity trends of Cu–Ni bimetallic nanoalloy catalysts for biomass-derived levulinic acid hydrogenation
Source: Royal Society of Chemistry journal article supplement (doi:10.1039/c8se00138c), 2018-01-01
Supplement: c8se00138c1.pdf [file c8se00138c1.pdf]

*Supporting Information*

**Unraveling Structural Properties and Reactivity Trends of Cu-Ni Bimetallic Nanoalloy Catalyst for Biomass-Derived Levulinic Acid Hydrogenation**

Pendem Saikiran,<sup>a</sup> Indranil Mondal,<sup>a</sup> Abhijit Shrotri,<sup>b</sup> Bolla Srinivasa Rao,<sup>a</sup> Nakka Lingaiah,<sup>a</sup> and John Mondal<sup>\*a</sup>

<sup>a</sup>Inorganic & Physical Chemistry Division, CSIR-Indian Institute of Chemical Technology, Uppal Road, Hyderabad-500007, India

<sup>b</sup>Institute for Catalysis, Hokkaido University, Kita 21 Nishi 10, Kita-Ku, Sapporo, Japan, 001-0021

### **Characterization Techniques:**

Powder X-ray diffraction (PXRD) patterns of different samples were recorded with a Rigaku Ultima IV X-ray diffractometer equipped with a semiconductor array detector (D/teX Ultra). High Resolution Transmission electron microscopy (HR-TEM) images were recorded in a JEOL JEM 2010 transmission electron microscope with operating voltage 200 Kv equipped with a FEG. Field emission scanning electron microscopic images of samples were obtained using a JEOL JSM 7400F field emission scanning electron microscope (FE-SEM). FT IR spectra of the samples were recorded using a Nicolet MAGNA-FT IR 750 Spectrometer Series II. Solid-state  $^{13}\text{C}$  and  $^{29}\text{Si}$  CP-MAS NMR studies were performed using a Bruker Avance III HD 400 MHz NMR spectrometer. Transmission electron microscope high-annular dark-field scanning (HAADF-STEM) and energy-dispersive X-ray mapping images were obtained with a TECNAI G2 F20 equipped with an EDX detector. X-ray photoelectron spectroscopy (XPS) was performed on an Omicron nanotech operated at 15 Kv and 20 Ma with a monochromatic Al  $K\alpha$  X-ray source. Quadrupole ion trap Mass Spectrometer equipped with Thermo Accela LC and Agilent 6890 GC system equipped with a flame ionization detector were used for analysis of catalytic reactions. The loading amounts of Cu and Ni were determined using an inductively coupled plasma optical emission spectrometer (ICP-OES, Icap-6500DUO, Thermo Fisher Scientific). The nature of the acid sites of the catalysts was examined by pyridine adsorbed FT-IR spectroscopy (Carry 660, Agilent Technologies). The experiments were performed in situ using a purpose-made IR cell connected to a vacuum adsorption setup. In a typical method, the reduced samples were pressed into self-supporting wafers (density  $40 \text{ mg cm}^{-3}$ ) at a pressure of  $10^5 \text{ Pa}$ . Subsequently, the wafers were transferred into the IR cell and were pre-treated in  $\text{N}_2$  flow by heating at a rate of  $10^\circ\text{C min}^{-1}$  up to  $400^\circ\text{C}$  for 1 h. After cooling down to  $150^\circ\text{C}$ , the spectrum was collected in the drift mode. The sample was then exposed to pyridine until surface saturation in successive pulse injections at  $150^\circ\text{C}$  and subsequently the sample was purged for 30 min in  $\text{N}_2$  flow before

recording the spectrum. The drift spectra after pyridine adsorption were subtracted from the spectra of the untreated catalyst to obtain the vibrational bands owing to pyridine acid site interaction. The H<sub>2</sub>-TPR analysis was carried out in a quartz micro-reactor interfaced to a gas chromatograph (GC) equipped with a thermal conductivity detector (TCD) unit. Prior to TPR analysis, the catalyst was degassed at 300°C in helium gas for 30 min and then cooled to room temperature. The helium gas was switched to 4.97% H<sub>2</sub> in argon with a flow rate of 30 mL min<sup>-1</sup> and the temperature was increased to 900 °C at a ramping rate of 5 °C min<sup>-1</sup>.

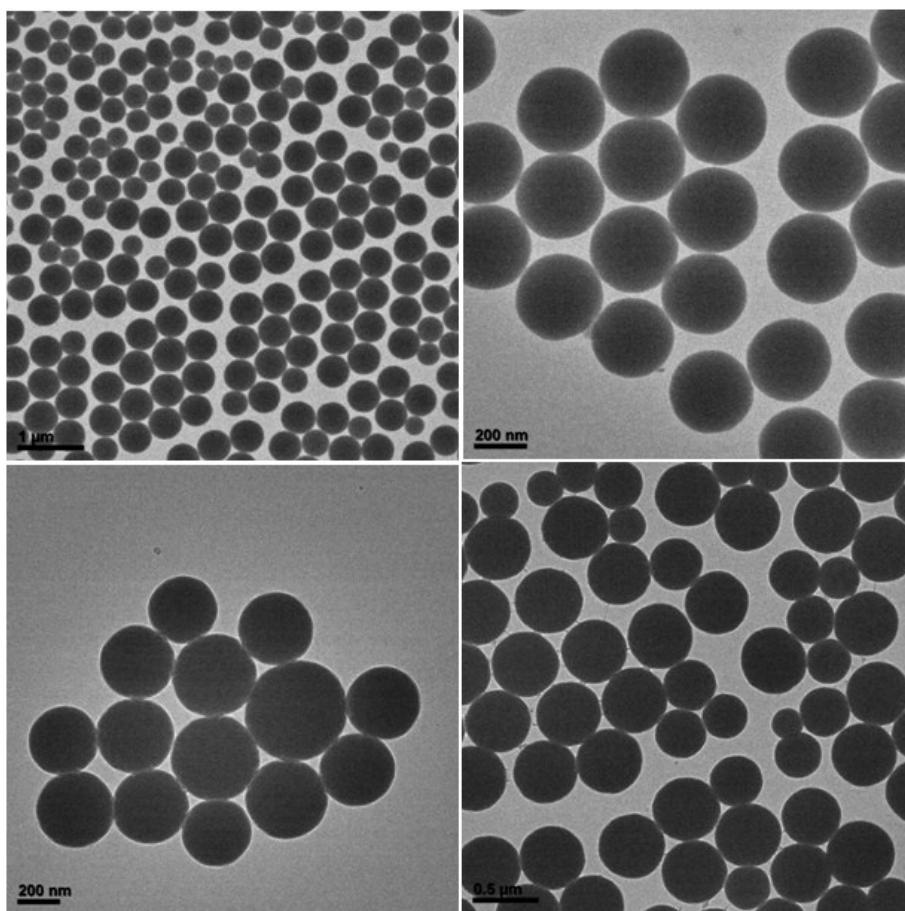

**Figure S1:** TEM images of the -NH<sub>2</sub> functionalized SiO<sub>2</sub> nanosphere.

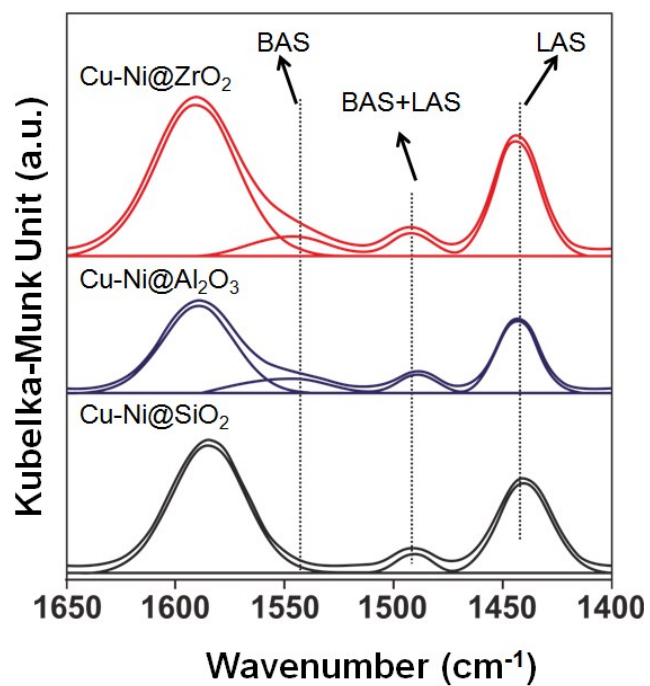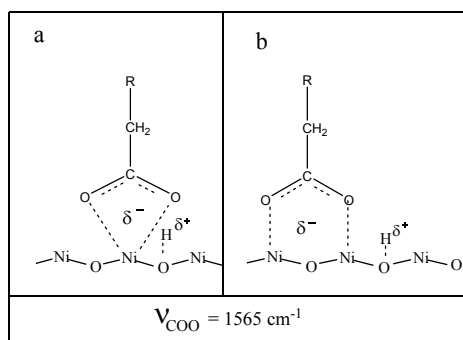

**Figure S2:** Pyridine adsorbed drift spectra of Cu-Ni@ZrO<sub>2</sub>, Cu-Ni@Al<sub>2</sub>O<sub>3</sub> and Cu-Ni@SiO<sub>2</sub> catalysts, respectively.

**Table S1:** Inductively coupled plasma optical emission spectroscopy (ICP OES) elemental analysis results of the bimetallic Cu-Ni nanoalloy.

| <b>Catalyst</b>                             | <b>Cu-content (mmolg<sup>-1</sup>)</b> | <b>Ni-content (mmolg<sup>-1</sup>)</b> |
|---------------------------------------------|----------------------------------------|----------------------------------------|
| CuNi@SiO <sub>2</sub> - <b>A</b><br>(fresh) | 0.00571                                | 0.00032                                |
| CuNi@SiO <sub>2</sub> - <b>B</b><br>(fresh) | 0.00347                                | 0.00191                                |
| CuNi@SiO <sub>2</sub> - <b>C</b><br>(fresh) | 0.00271                                | 0.0028                                 |
| CuNi@SiO <sub>2</sub> - <b>A</b><br>(spent) | 0.00535                                | 0.00031                                |
| CuNi@SiO <sub>2</sub> - <b>B</b><br>(spent) | 0.00301                                | 0.00165                                |
| CuNi@SiO <sub>2</sub> - <b>C</b><br>(spent) | 0.00213                                | 0.0023                                 |

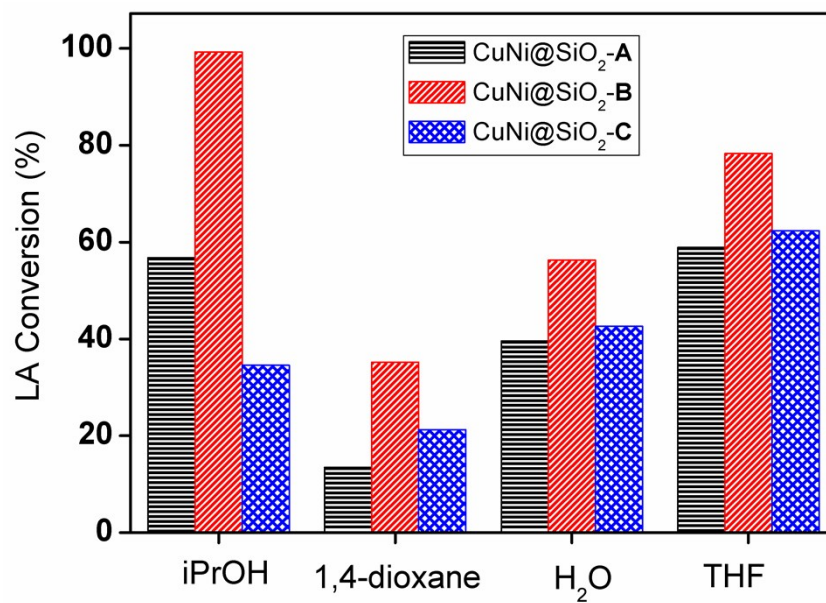

**Figure S3:** GVL yields as a function of the various solvent used in levulinic acid hydrogenation using CuNi@SiO<sub>2</sub>-B catalyst. Experimental conditions: 0.2 mL levulinic acid (2 mmol), Temperature (120°C), H<sub>2</sub> pressure (40 bar), Time (13 h), iPrOH (40 mL).

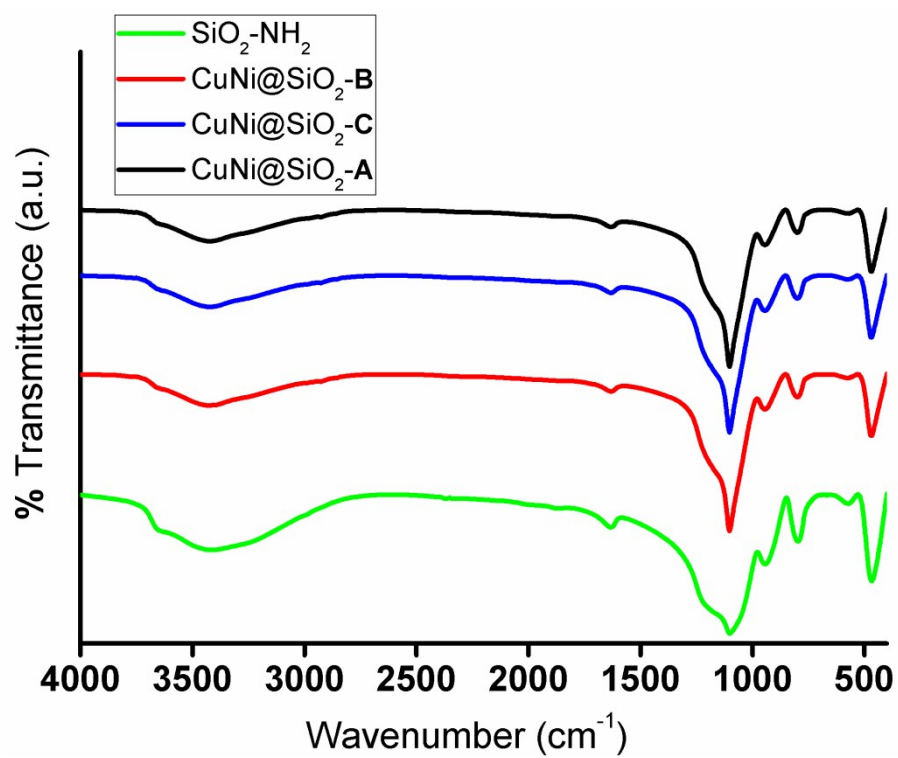

**Figure S4:** FT-IR spectra of all CuNi@SiO<sub>2</sub> materials.



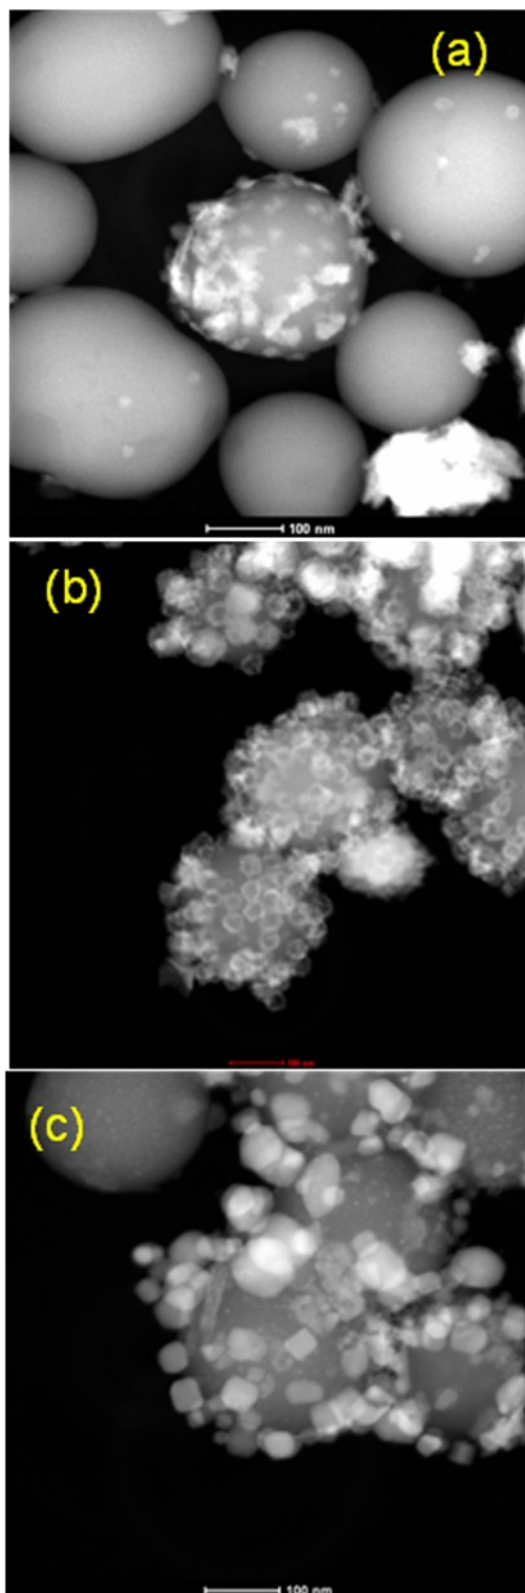

**Figure S5:** HAADF-STEM images of (a) CuNi@SiO<sub>2</sub>-A, (b) CuNi@SiO<sub>2</sub>-B and (c) CuNi@SiO<sub>2</sub>-C, respectively.

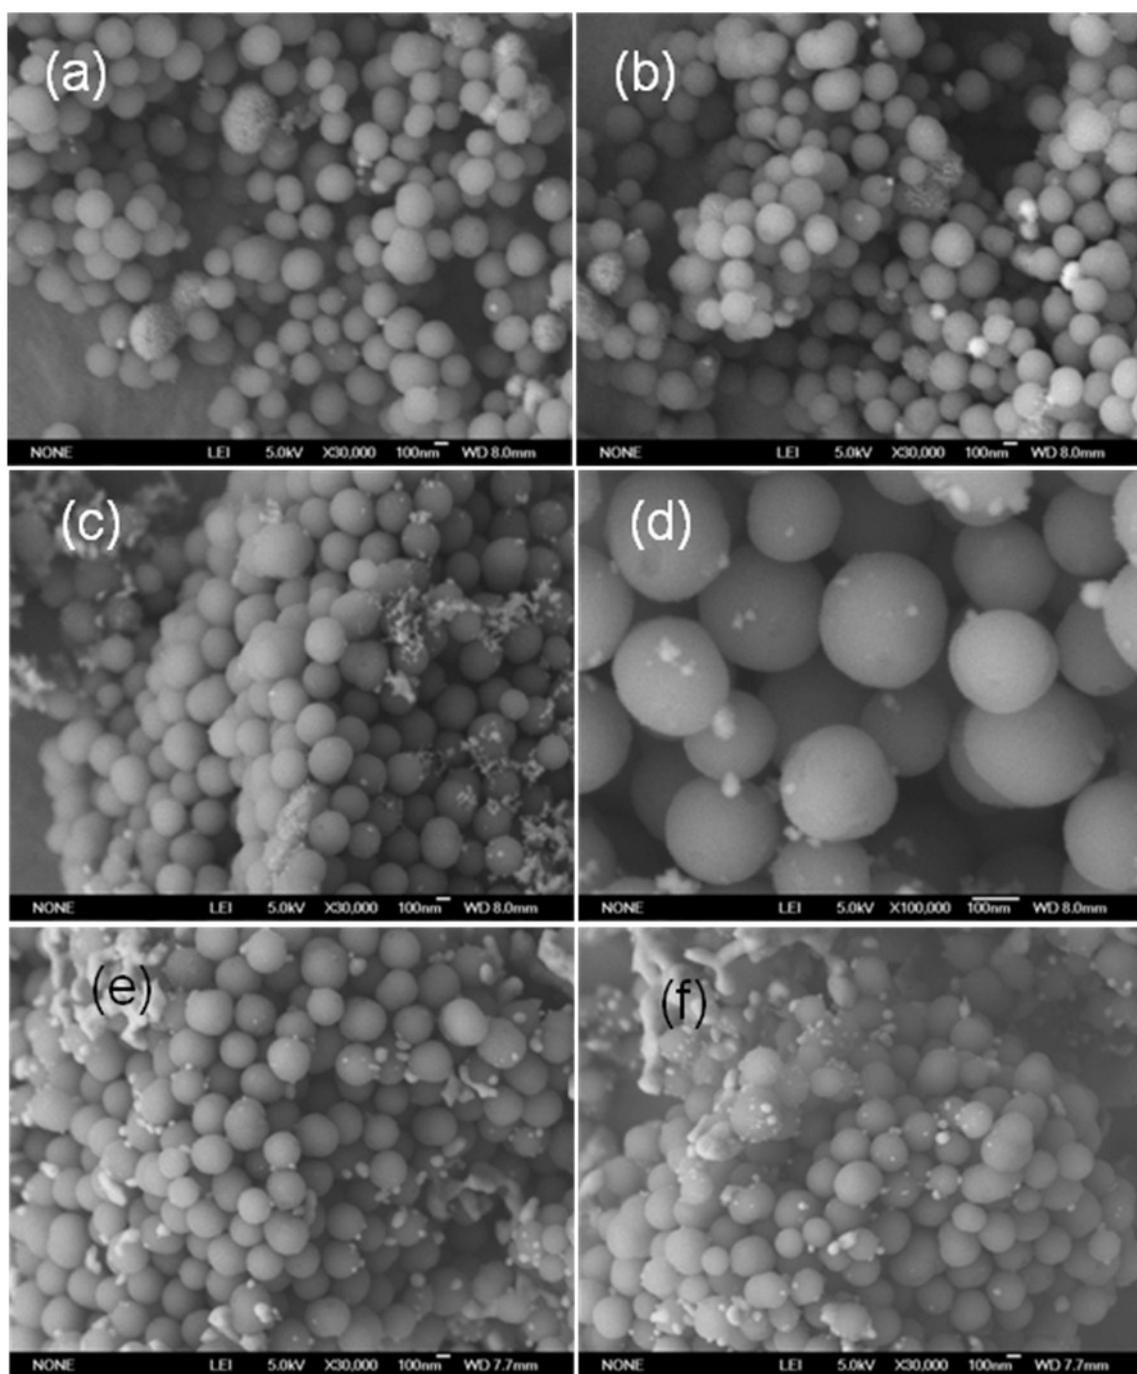

**Figure S6:** FE-SEM images of (a, b) CuNi@SiO<sub>2</sub>-A, (c, d) CuNi@SiO<sub>2</sub>-B and (e, f) CuNi@SiO<sub>2</sub>-C, respectively.

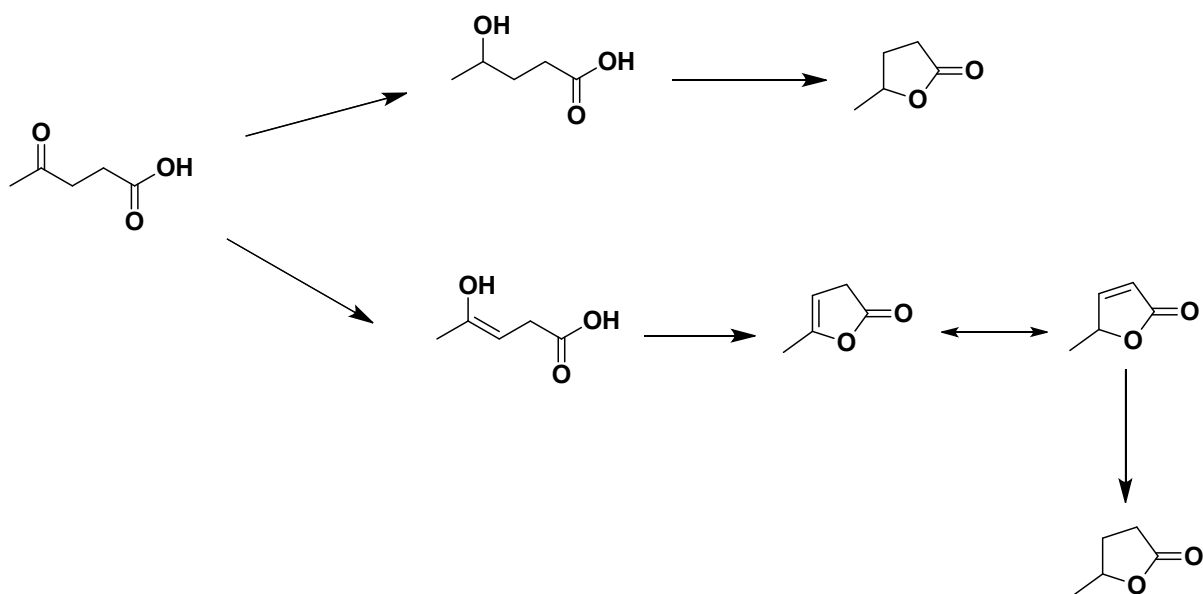

**Figure S7:** Proposed mechanistic pathway for LA hydrogenation to GVL.

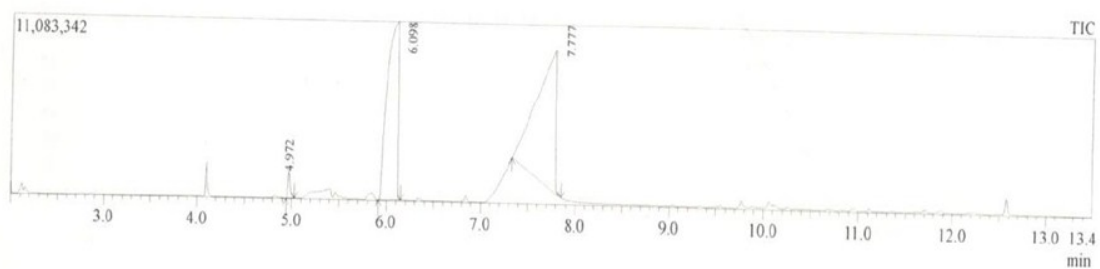

Line#:1 R.Time:4.970(Scan#:595)  
 MassPeaks:177  
 RawMode:Averaged 4.965-4.975(594-596) BasePeak:98(442603)  
 BG Mode:Calc. from Peak Group 1 - Event 1 Scan

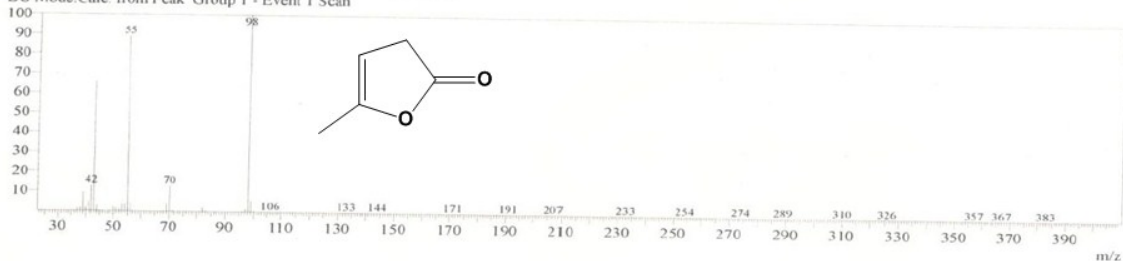

Line#:2 R.Time:6.100(Scan#:821)  
 MassPeaks:198  
 RawMode:Averaged 6.095-6.105(820-822) BasePeak:56(3437823)  
 BG Mode:Calc. from Peak Group 1 - Event 1 Scan

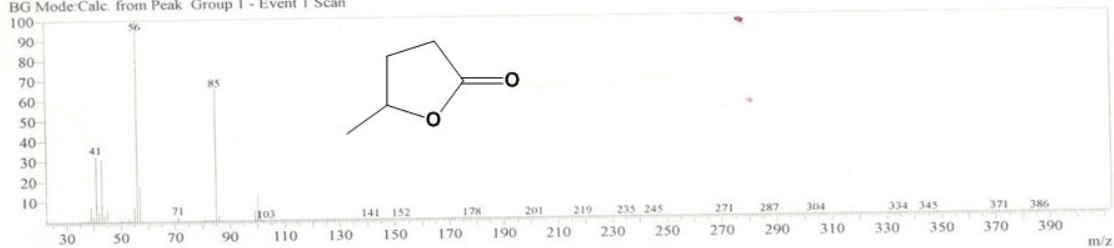

Line#:3 R.Time:7.775(Scan#:1156)  
 MassPeaks:271  
 RawMode:Averaged 7.770-7.780(1155-1157) BasePeak:43(4488019)  
 BG Mode:Calc. from Peak Group 1 - Event 1 Scan

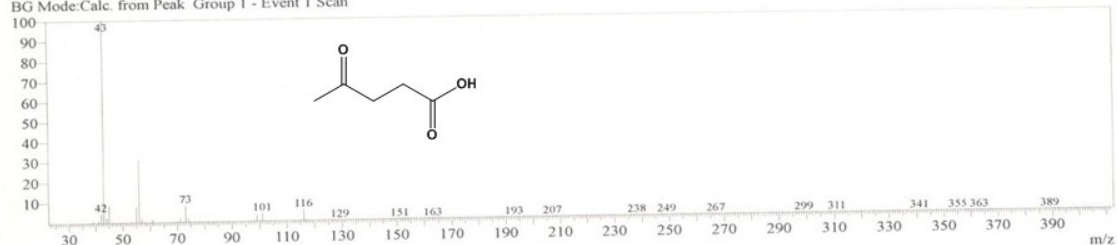

**Figure S8:** Progress of the catalytic LA to GVL hydrogenation by GC-MS analysis.
